# Supplementary material
Source: HighWire-hosted journal article supplement (https://gh.bmj.com/content/3/3/e000828)
Supplement: inline-supplementary-material-1 [file inline-supplementary-material-1.pdf]

## Appendix

**Figure A1.** Household monthly expenditure on medicine and total outpatient services

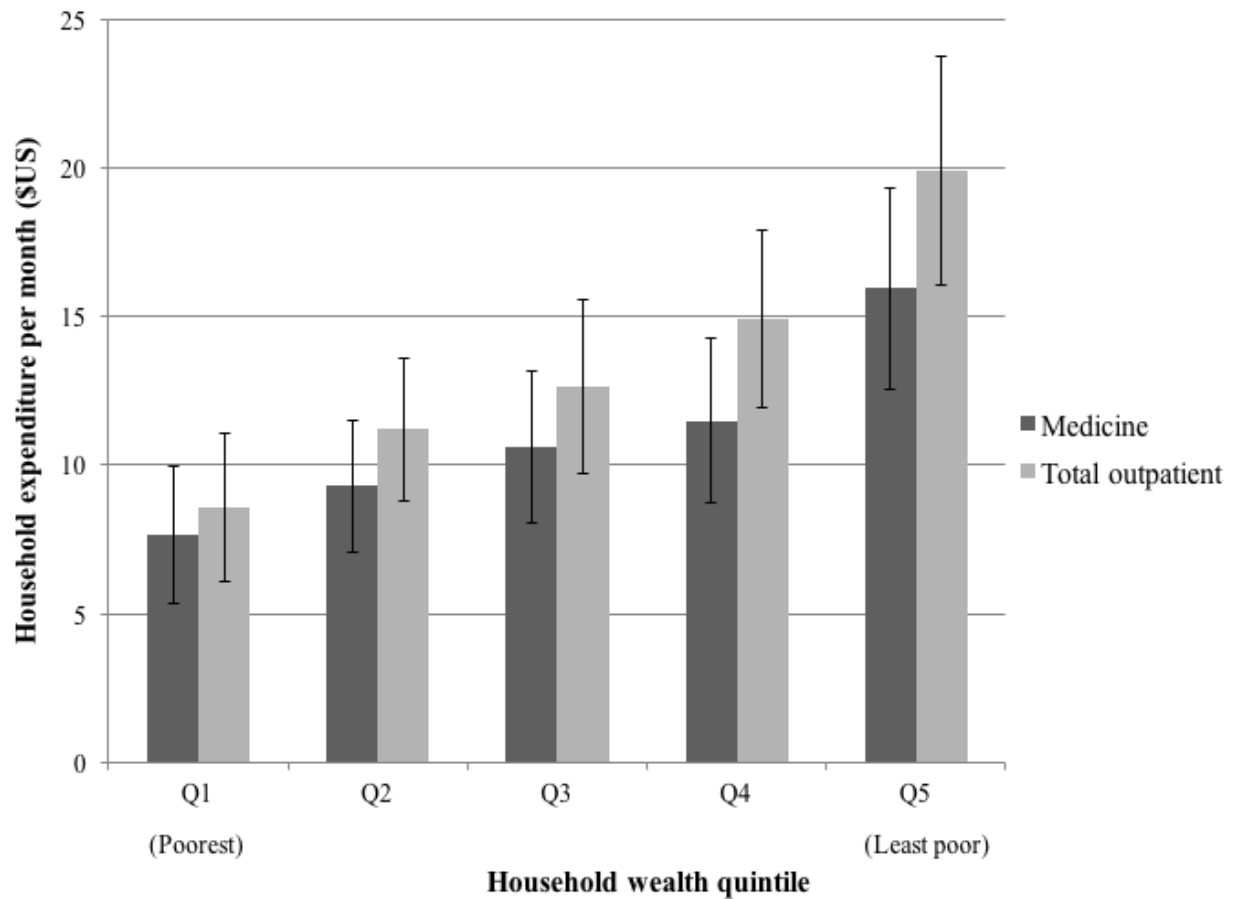

*Notes:* Error bars indicate 95% confidence intervals. All standard errors adjusted to account for clustering within villages. Test for trend in relationship between wealth quintile and monthly household expenditure on medicine:  $p < 0.001$ . Test for trend in relationship between wealth quintile and monthly household expenditure on total outpatient services:  $p < 0.001$ .

**Table A1.** Household assets

| <b>Household Asset</b>                  | <b>Probability of ownership</b> |
|-----------------------------------------|---------------------------------|
| Bicycle                                 | 0.29                            |
| Motorcycle or scooter                   | 0.14                            |
| Animal-drawn cart                       | 0.07                            |
| Car or truck                            | 0.06                            |
| Boat with a motor                       | 0.01                            |
| Clock or watch                          | 0.36                            |
| Electricity                             | 0.42                            |
| Radio                                   | 0.74                            |
| Television                              | 0.35                            |
| Refrigerator                            | 0.05                            |
| Non-mobile telephone                    | 0.02                            |
| Mobile telephone                        | 0.91                            |
| Finished floor                          | 0.54                            |
| Finished walls                          | 0.56                            |
| Finished roof                           | 0.14                            |
| Ownership of land upon which house sits | 0.93                            |
| Ownership of agricultural land          | 0.86                            |
| Livestock                               | 0.88                            |

**Table A2. Price paid for medicines by wealth quintile**

|                                                                | Wealth quintile             |                            |                            |                            |                            |
|----------------------------------------------------------------|-----------------------------|----------------------------|----------------------------|----------------------------|----------------------------|
|                                                                | Q1<br>(Poorest)             | Q2                         | Q3                         | Q4                         | Q5<br>(Least poor)         |
| <b>HCTZ (hypertension)</b>                                     |                             |                            |                            |                            |                            |
| Price paid per monthly dose (\$US), mean (SD)                  | \$1.01<br>(\$1.19)          | \$0.77<br>(\$1.54)         | \$0.35<br>(\$0.55)         | \$0.88<br>(\$1.37)         | \$0.97<br>(\$1.39)         |
| Price paid per monthly dose (\$US), median (IQR)               | \$0.75<br>(\$0.38, \$1.50)  | \$0.27<br>(\$0.00, \$0.75) | \$0.00<br>(\$0.00, \$0.50) | \$0.30<br>(\$0.00, \$1.07) | \$0.34<br>(\$0.00, \$1.50) |
| Proportion receiving for free                                  | 0.21                        | 0.48                       | 0.51                       | 0.26                       | 0.32                       |
| Price paid per monthly dose when not free (\$US), mean (SD)    | \$1.29<br>(\$1.20)          | \$1.48<br>(\$1.90)         | \$0.72<br>(\$0.59)         | \$1.20<br>(\$1.48)         | \$1.41<br>(\$1.49)         |
| Price paid per monthly dose when not free (\$US), median (IQR) | \$0.75<br>(\$0.54, \$1.50)  | \$0.75<br>(\$0.60, \$1.50) | \$0.50<br>(\$0.30, \$0.75) | \$0.75<br>(\$0.30, \$1.50) | \$0.75<br>(\$0.30, \$1.80) |
| <b>Metformin (diabetes)</b>                                    |                             |                            |                            |                            |                            |
| Price paid per monthly dose (\$US), mean (SD)                  | \$2.34<br>(\$1.46)          | \$1.07<br>(\$1.56)         | \$0.57<br>(\$1.18)         | \$1.61<br>(\$1.90)         | \$2.21<br>(\$2.85)         |
| Price paid per monthly dose (\$US), median (IQR)               | \$2.40<br>(\$1.50, \$2.95)  | \$0.54<br>(\$0.00, \$1.50) | \$0.00<br>(\$0.00, \$0.58) | \$1.25<br>(\$0.00, \$2.14) | \$1.20<br>(\$0.00, \$3.00) |
| Proportion receiving for free                                  | 0.13                        | 0.40                       | 0.63                       | 0.39                       | 0.44                       |
| Price paid per monthly dose when not free (\$US), mean (SD)    | \$2.67<br>(\$1.21)          | \$1.79<br>(\$1.67)         | \$1.51<br>(\$1.58)         | \$2.65<br>(\$1.78)         | \$3.98<br>(\$2.74)         |
| Price paid per monthly dose when not free (\$US), median (IQR) | \$2.67<br>(\$1.50, \$3.21)  | \$1.50<br>(\$0.60, \$1.50) | \$0.98<br>(\$0.42, \$1.88) | \$1.80<br>(\$1.29, \$3.60) | \$3.00<br>(\$2.40, \$3.30) |
| <b>Salbutamol inhaler (asthma)</b>                             |                             |                            |                            |                            |                            |
| Price paid per monthly dose (\$US), mean (SD)                  | \$6.00<br>(\$5.66)          | \$1.93<br>(\$1.86)         | \$3.17<br>(\$1.97)         | \$3.67<br>(\$3.25)         | \$3.24<br>(\$3.47)         |
| Price paid per monthly dose (\$US), median (IQR)               | \$6.00<br>(\$2.00, \$10.00) | \$2.50<br>(\$0.00, \$3.50) | \$3.25<br>(\$2.50, \$4.00) | \$3.00<br>(\$1.20, \$5.00) | \$3.50<br>(\$0.00, \$4.00) |
| Proportion receiving for free                                  | 0.00                        | 0.43                       | 0.17                       | 0.14                       | 0.20                       |
| Price paid per monthly dose when not free (\$US), mean (SD)    | \$6.00<br>(\$5.66)          | \$3.38<br>(\$0.63)         | \$3.80<br>(\$1.35)         | \$4.28<br>(\$3.09)         | \$4.05<br>(\$3.41)         |
| Price paid per monthly dose when not free (\$US), median (IQR) | \$6.00<br>(\$2.00, \$10.00) | \$3.50<br>(\$3.00, \$3.75) | \$3.50<br>(\$3.00, \$4.00) | \$3.50<br>(\$2.50, \$5.00) | \$3.75<br>(\$1.85, \$6.25) |
